# Supplementary material for: Surfactant-free porous nano-Mn3O4 as a recyclable Fenton-like reagent that can rapidly scavenge phenolics without H2O2
Source: Royal Society of Chemistry journal article supplement (doi:10.1039/c7ta04042c), 2017-01-01
Supplement: c7ta04042c1.pdf [file c7ta04042c1.pdf]

## Surfactant-free Porous nano-Mn<sub>3</sub>O<sub>4</sub> as a Recyclable Fenton-Like Reagent That Can Rapidly Scavenge Phenolics without H<sub>2</sub>O<sub>2</sub>

Zhenzhang Weng<sup>a,b</sup>, Jie Li<sup>c</sup>, Yali Weng<sup>a,b</sup>, Miao Feng<sup>a,b</sup>, Zanyong Zhuang<sup>a,b,\*</sup>, Yan Yu<sup>a,b,\*</sup>

<sup>a</sup> Key Laboratory of Eco-materials Advanced Technology, Fuzhou University, Fuzhou, Fujian 350108, China

<sup>b</sup> College of Materials Science and Engineering, Fuzhou University, Minhou, Fujian 350108, China

<sup>c</sup> Mechanical and Electrical Engineering Practice Center, Fuzhou University, Minhou, Fujian 350108, China

\*Corresponding author. Fax: +86-0591-22866534;

E-mail address: zyzhuang@fzu.edu.cn; yuyan@fzu.edu.cn

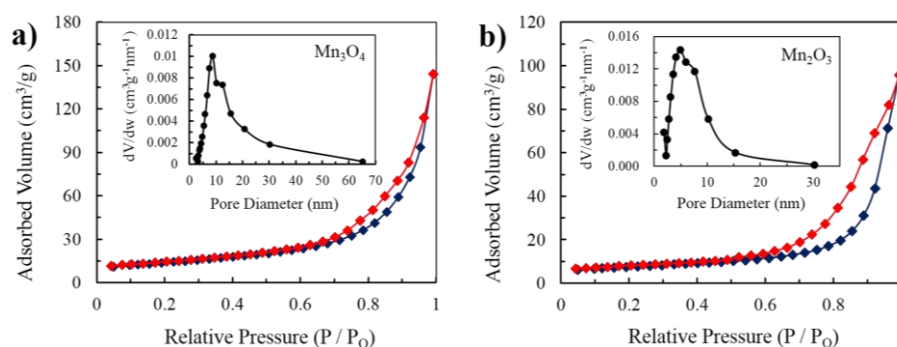

Figure S1. The Brunauer-Emmett-Teller plot of the porous Mn<sub>3</sub>O<sub>4</sub> and Mn<sub>2</sub>O<sub>3</sub> microspheres.

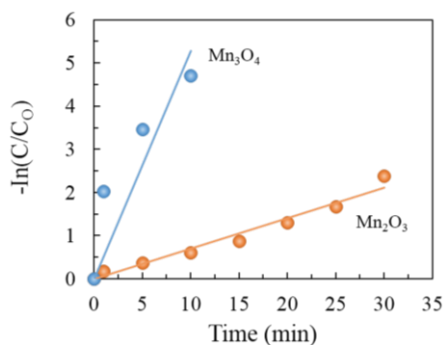

Figure S2. Calculation of the rate constant ( $k$ ) of phenol removal by Mn<sub>3</sub>O<sub>4</sub> and Mn<sub>2</sub>O<sub>3</sub>.

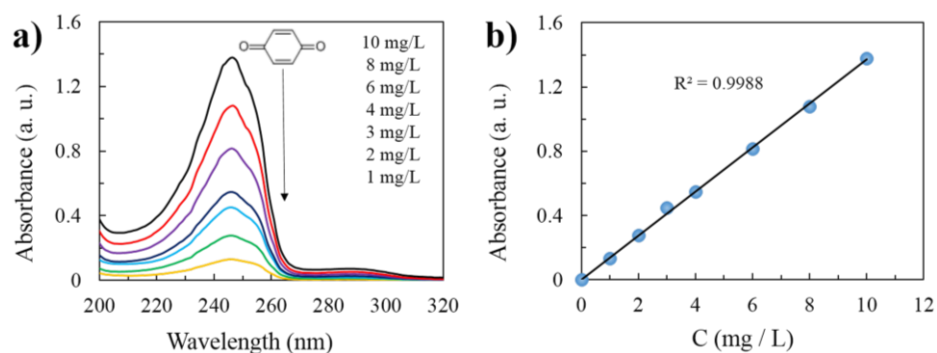

**Figure S3.** a) The UV-vis spectra of p-benzoquinone with varied concentration from 1 to 10 mg/L; b) the standard curve of UV-vis absorbance vs p-benzoquinone concentration recorded at 246 nm.

**Table S1.** Percent contribution of  $\text{Mn}^{2+}$ ,  $\text{Mn}^{3+}$  and  $\text{Mn}^{4+}$  to the Mn  $2p_{3/2}$  peak in the XPS spectra.

| Sample                          | $\text{Mn}^{2+}$ | $\text{Mn}^{3+}$ | $\text{Mn}^{4+}$ | Average valence state of Mn |
|---------------------------------|------------------|------------------|------------------|-----------------------------|
| $\text{Mn}_3\text{O}_4$         | 45.0%            | 55.0%            | n.d.             | 2.6                         |
| $\text{Mn}_3\text{O}_4$ -phenol | n.d.             | 25.3%            | 74.7%            | 3.7                         |
| $\text{Mn}_2\text{O}_3$         | n.d.             | 59.5%            | 40.5%            | 3.4                         |
| $\text{Mn}_2\text{O}_3$ -phenol | n.d.             | 36.9%            | 63.1%            | 3.6                         |

n.d.: not detected.

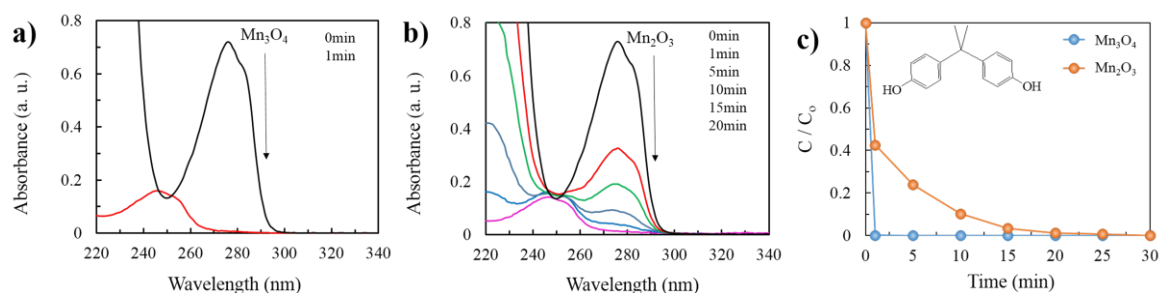

**Figure S4.** The UV-Vis absorption spectra of bisphenol A solution in the presence of a)  $\text{Mn}_3\text{O}_4$  and b)  $\text{Mn}_2\text{O}_3$ ; and c) the corresponding removal efficiency by  $\text{Mn}_3\text{O}_4$  and  $\text{Mn}_2\text{O}_3$  as a function of time.

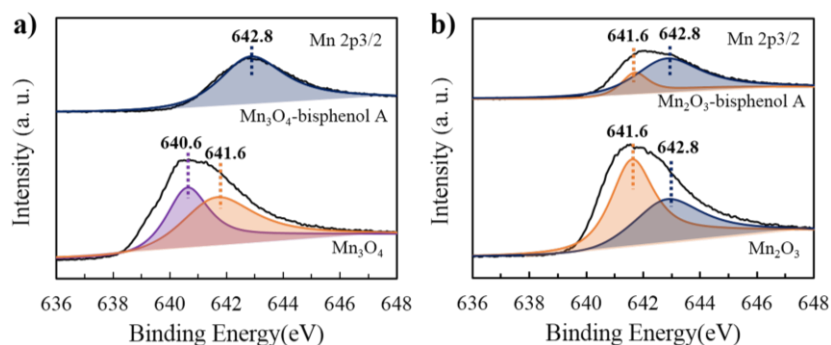

Figure S5. The Mn 2p<sub>3/2</sub> peak in the XPS spectra of a) Mn<sub>3</sub>O<sub>4</sub> and b) Mn<sub>2</sub>O<sub>3</sub>, before and after bisphenol A removal.

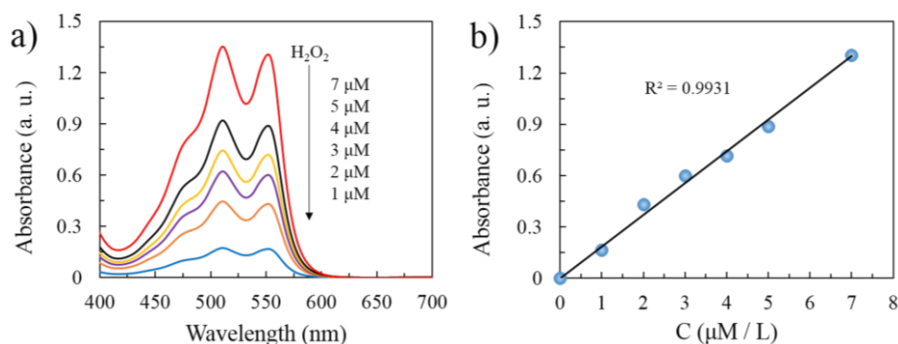

Figure S6. a) The UV-vis spectra and b) the standard curve of absorbance vs H<sub>2</sub>O<sub>2</sub> concentration (1 to 7 μM) recorded at 551 nm. The curves were obtained by the addition of DPD (50 μL) and POD (50 μL) to the sampled aliquots and measuring the UV-vis spectra of the resulting solution

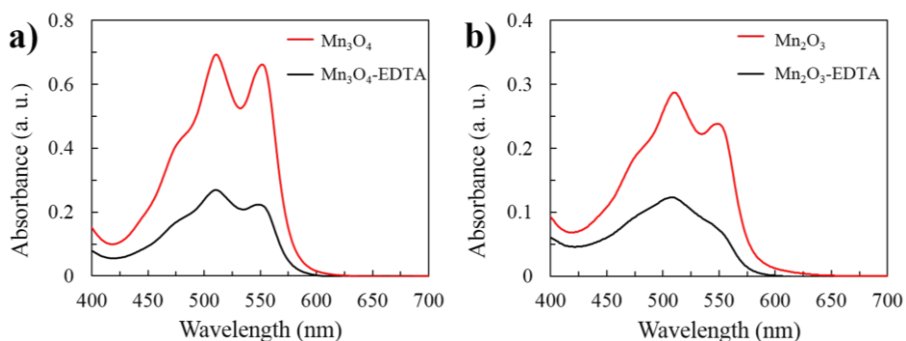

Figure S7. Detection of H<sub>2</sub>O<sub>2</sub> in the aqueous dispersions of a) Mn<sub>3</sub>O<sub>4</sub> and b) Mn<sub>2</sub>O<sub>3</sub> with EDTA addition; The curves were obtained by the addition of DPD (50 μL) and POD (50 μL) to the sampled aliquots (after 30 min of reaction) in the phenol removal experiments and measuring the UV-Vis spectra of the resulting solution.

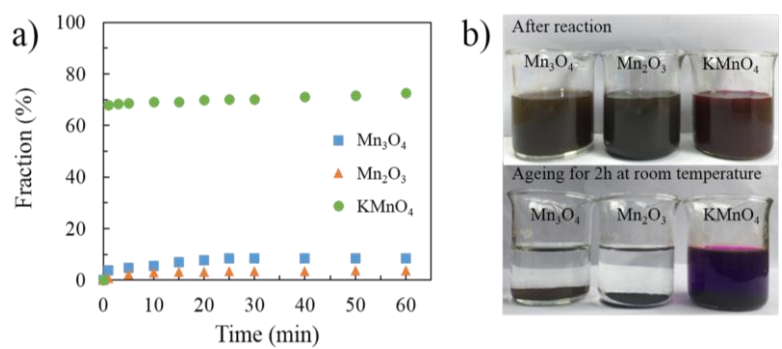

**Figure S8.** a) The leaching ratio of manganese in solution as time function, during phenol removal with Mn<sub>3</sub>O<sub>4</sub>, Mn<sub>2</sub>O<sub>3</sub> and KMnO<sub>4</sub> at acidic condition (pH=2.0), respectively; b) The settleability test of solution after the use of identical-molar manganese of Mn<sub>3</sub>O<sub>4</sub>, Mn<sub>2</sub>O<sub>3</sub> and KMnO<sub>4</sub>, respectively.
